# Supplementary material for: Tunning the optical properties of a photocatalytic metal–organic framework by means of molecular modelling
Source: Royal Society of Chemistry journal article supplement (doi:10.1039/d2nj04532j), 2022-12-12

**M-(vac)/S<sub>1</sub>**

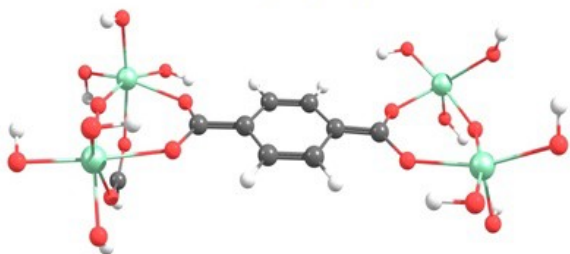

**M-CH<sub>3</sub>/S<sub>1</sub>**

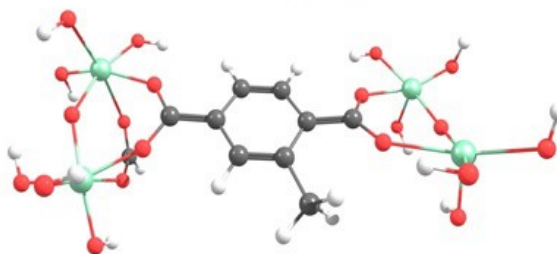

**M-OH/S<sub>1</sub>**

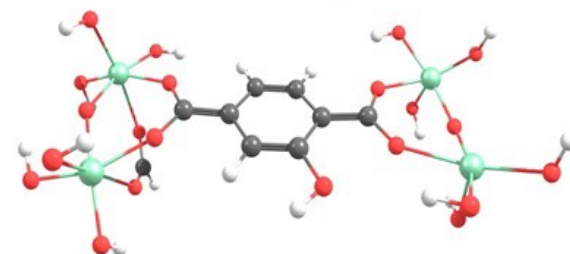

**M-NH<sub>2</sub>/S<sub>1</sub>**

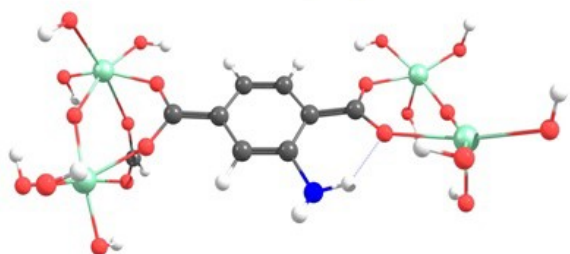

**M-NO<sub>2</sub>/S<sub>1</sub>**

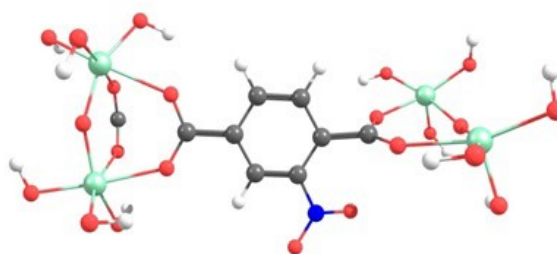

**M-SH/S<sub>1</sub>**

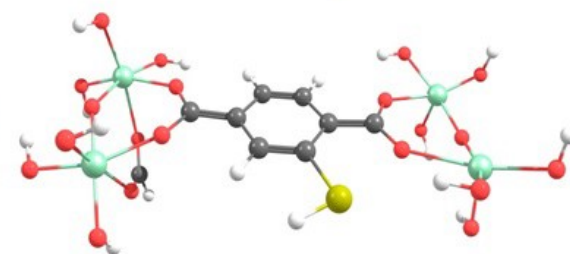

**M-(vac)/T<sub>1</sub>**

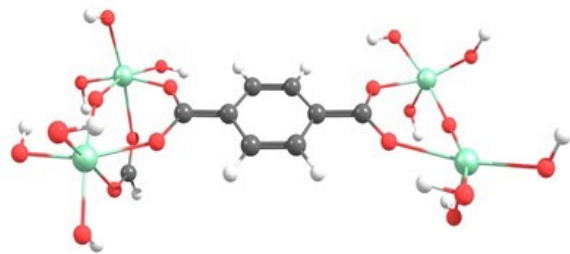

**M-CH<sub>3</sub>/T<sub>1</sub>**

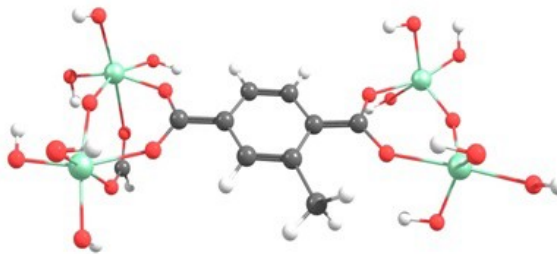

**M-OH/T<sub>1</sub>**

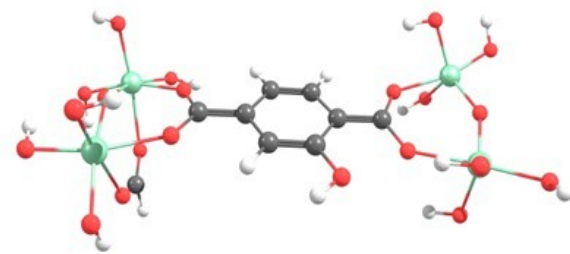

**M-NH<sub>2</sub>/T<sub>1</sub>**

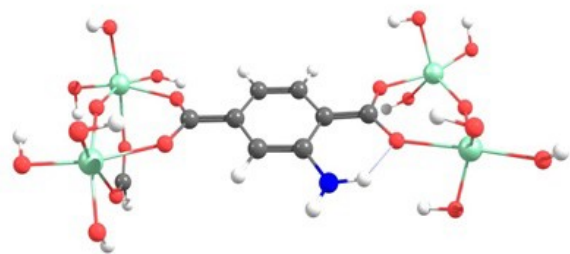

**M-NO<sub>2</sub>/T<sub>1</sub>**

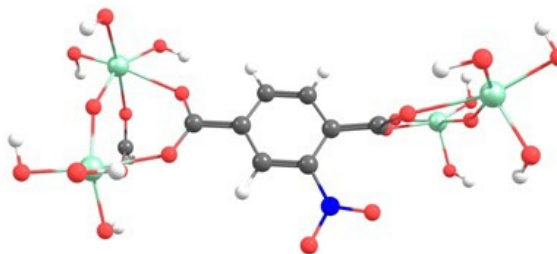

**M-SH/T<sub>1</sub>**

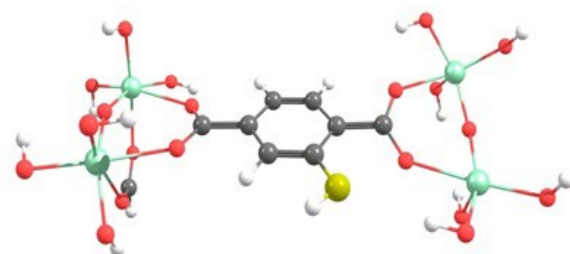

Supplement: d2nj04532j2.pdf [file d2nj04532j2.pdf]
