# Supplementary figures and images for: Tunning the optical properties of a photocatalytic metal–organic framework by means of molecular modelling
Source: Royal Society of Chemistry journal article supplement (doi:10.1039/d2nj04532j), 2022-12-12

M/S<sub>0</sub>

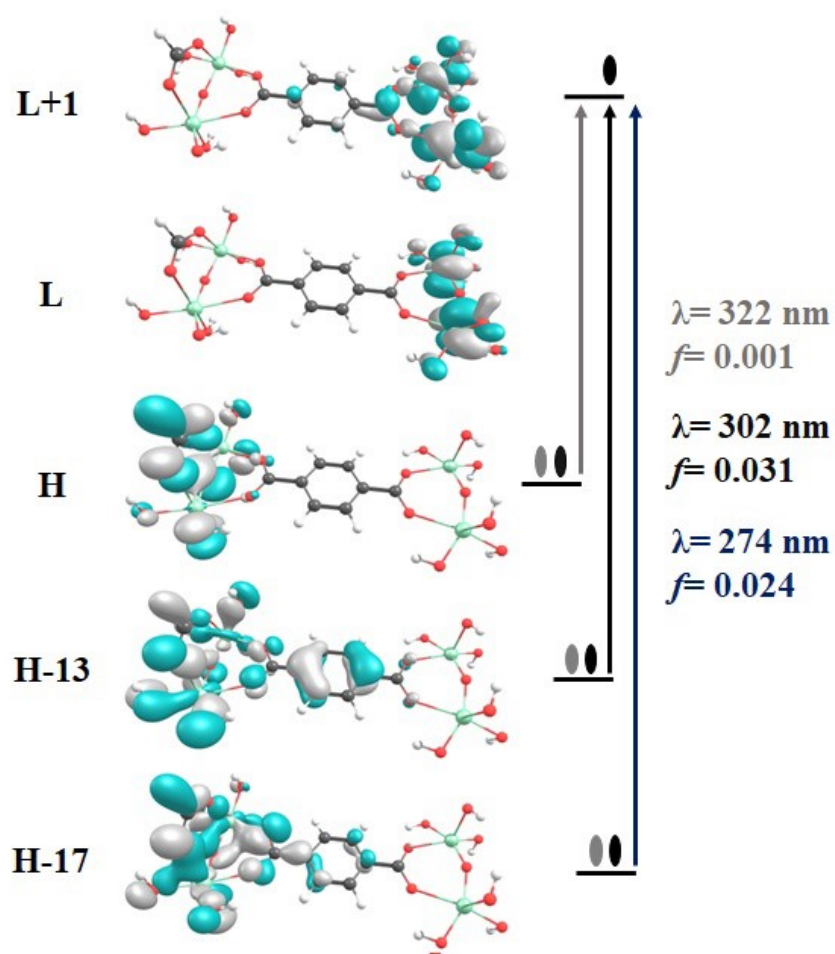

M-NH<sub>2</sub>/S<sub>0</sub>

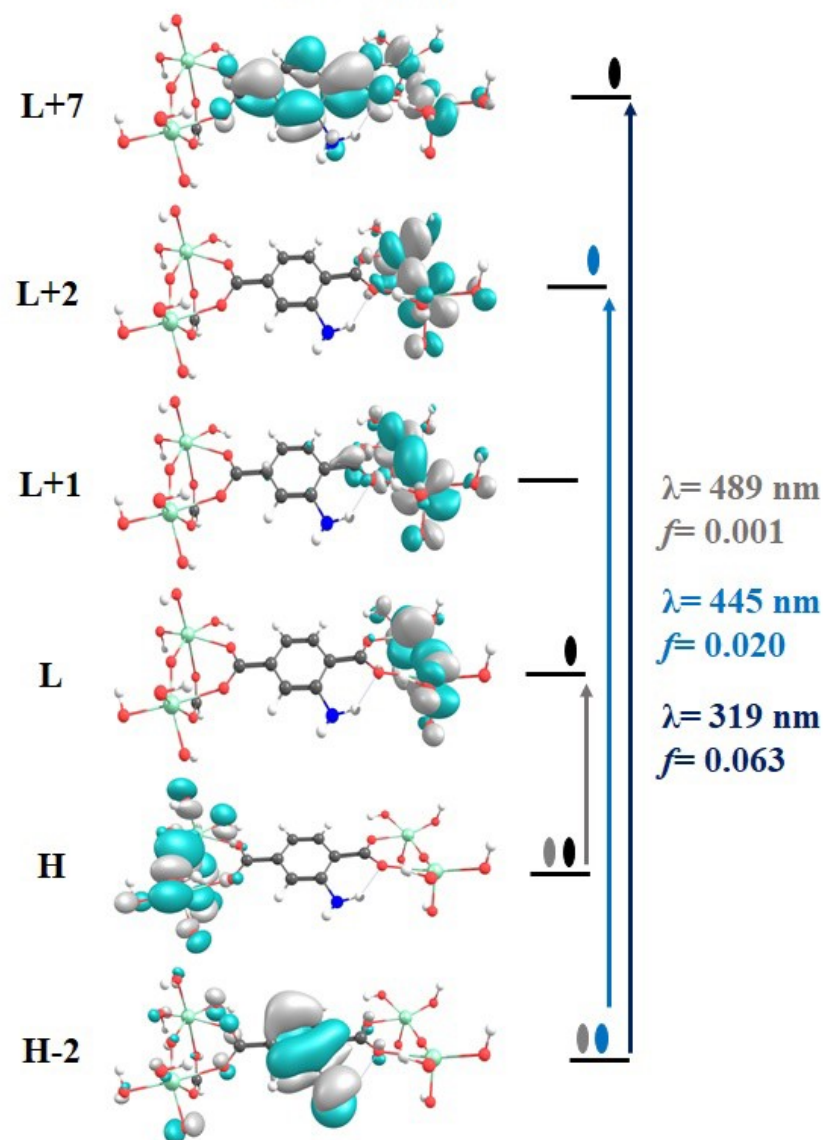

M-OH/S<sub>0</sub>

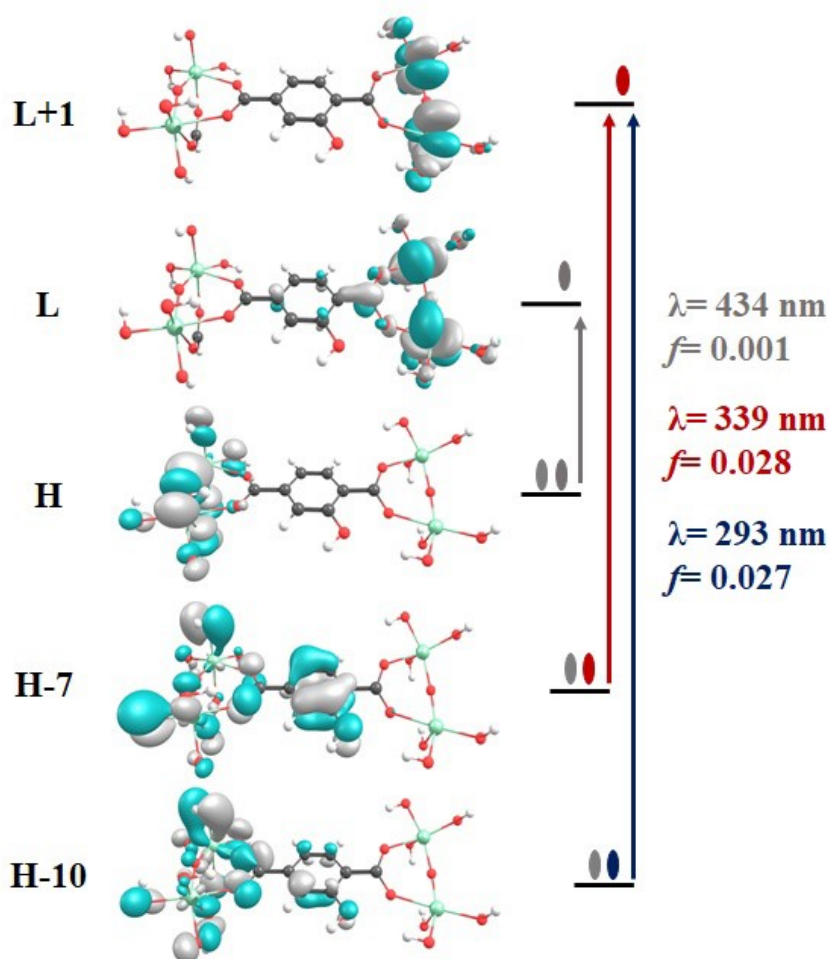

M-CH<sub>3</sub>/S<sub>0</sub>

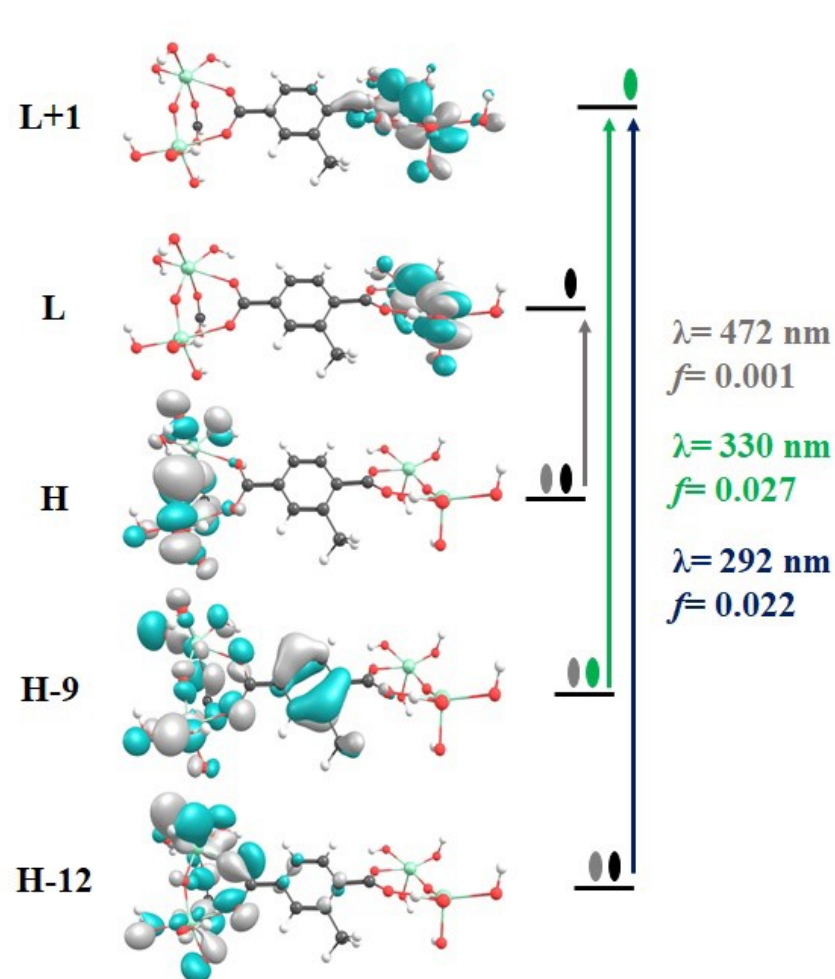

Supplement: d2nj04532j3.pdf [file d2nj04532j3.pdf]

**M-SH/S<sub>0</sub>**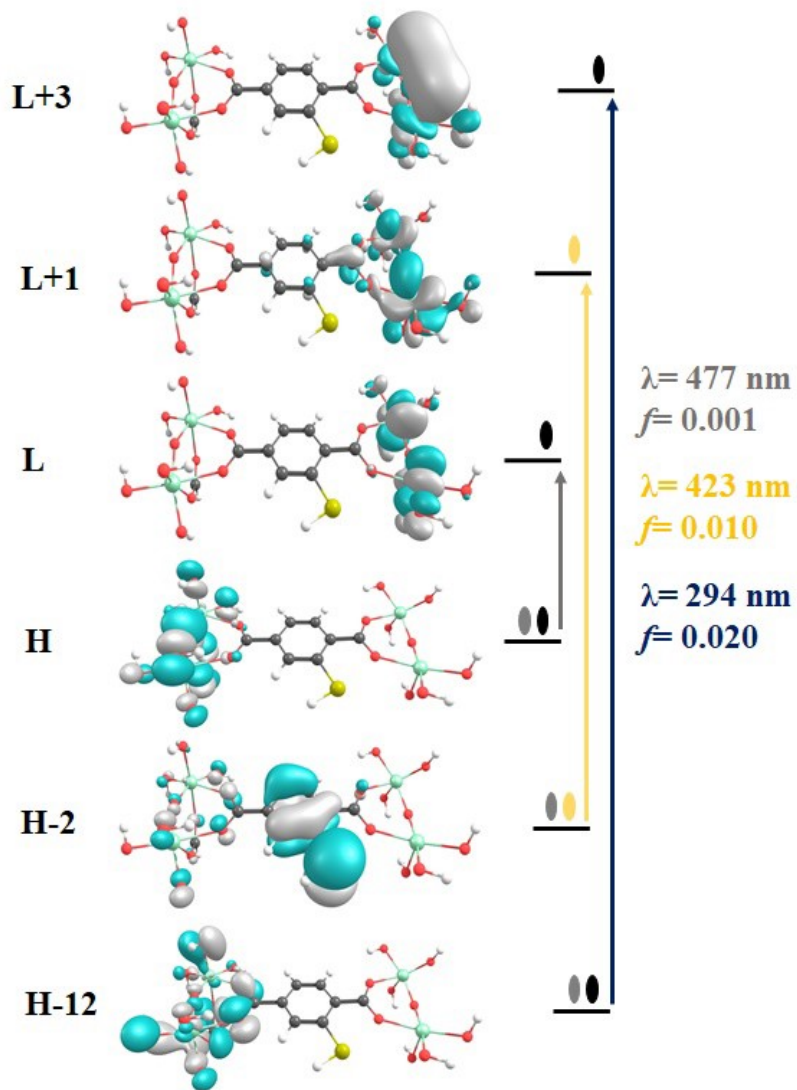**M-NO<sub>2</sub>/S<sub>0</sub>**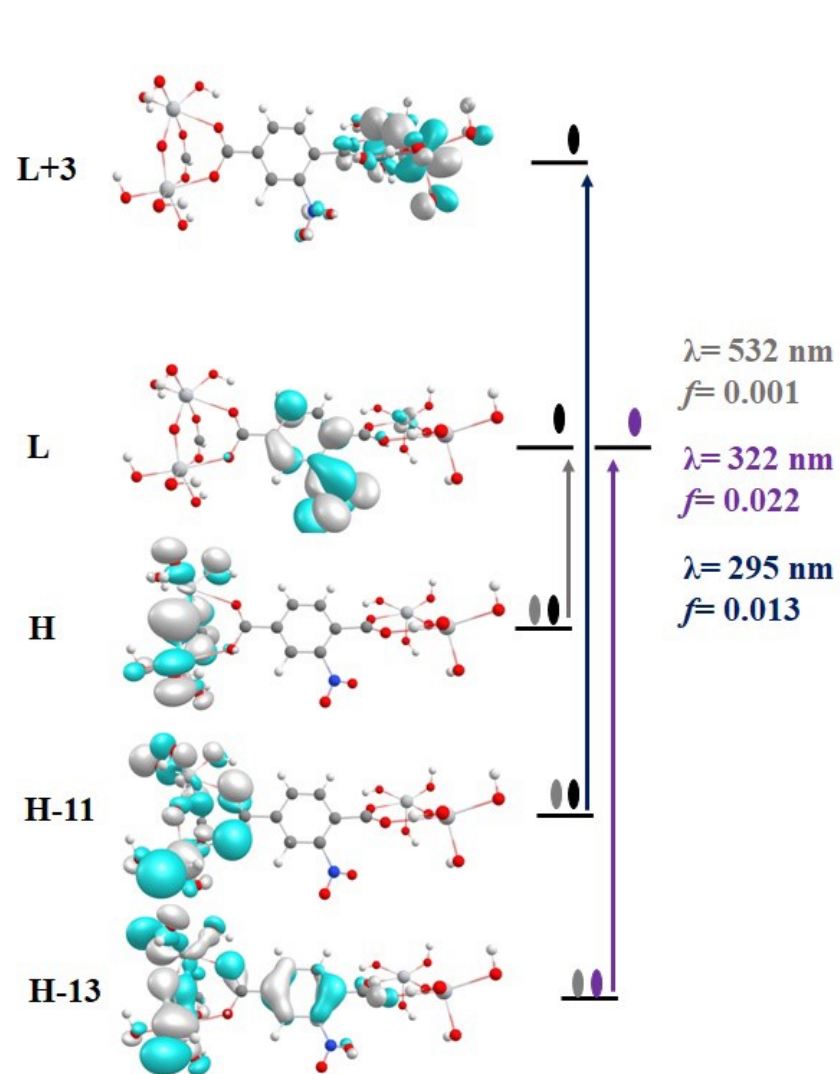

Supplement: d2nj04532j4.pdf [file d2nj04532j4.pdf]
